# Supplementary material for: An Improvement in Diagnostic Blood Culture Conditions Allows for the Rapid Detection and Isolation of the Slow Growing Pathogen Yersinia pestis
Source: MDPI journal article supplement (doi:10.3390/pathogens11020255), 2022-02-16
Supplement: s1 [file s1]

Table S1. BACTEC Blood culture ingredients

|                                   | BD BACTEC™ Plus<br>Aerobic/F | BD BACTEC™ Standard/10<br>Aerobic/F | BACTEC Standard<br>Anaerobic/F | BACTEC Lytic/10<br>Anaerobic/F |
|-----------------------------------|------------------------------|-------------------------------------|--------------------------------|--------------------------------|
| Processed Water                   | 30 ml                        | 40 ml                               | 40 ml                          | 40 ml                          |
| Soybean-Casein Digest Broth       | 3%                           | 3%                                  | 3%                             | 2.75%                          |
| Yeast Extract                     | 0.25%                        | 0.3%                                | 0.4%                           | 0.2%                           |
| Animal tissue digest              |                              | 0.01%                               | 0.01%                          | 0.05%                          |
| Amino Acids                       | 0.05%                        |                                     |                                |                                |
| Sugar                             | 0.2%                         | Sucrose 0.1%                        | Dextrose 0.25%                 | Dextrose 0.2%                  |
| Menadione                         |                              | 0.00005%                            | 0.00005%                       | 0.00005%                       |
| Hemin                             |                              | 0.0005%                             | 0.0005%                        | 0.0005%                        |
| Sodium Polyanetholsulfonate (SPS) | 0.05%                        | 0.035%                              | 0.025%                         | 0.035%                         |
| Vitamins                          | 0.025%                       | vitamin B6 0.001%                   |                                |                                |
| Antioxidants/Reductants           | 0.005%                       |                                     |                                |                                |
| Nonionic Adsorbing Resin          | 13.4%                        |                                     |                                |                                |
| Cationic Exchange Resin           | 0.9%                         |                                     |                                |                                |
| Sodium Bicarbonate                |                              | 0.04%                               | 0.04%                          | 0.04%                          |
| Thiols                            |                              |                                     | 0.1%                           | 0.1%                           |
| Sodium Citrate                    |                              |                                     |                                | 0.02%                          |
| Sodium Pyruvate                   |                              |                                     |                                | 0.01%                          |
| Saponin                           |                              |                                     |                                | 0.26%                          |
| Antifoaming Agent                 |                              |                                     |                                | 0.035%                         |
